# Supplementary material for: Transferrin-conjugated paclitaxel prodrugs for targeted cancer therapy
Source: Royal Society of Chemistry journal article supplement (doi:10.1039/c6ra15141h), 2016-01-01
Supplement: c6ra15141h1.pdf [file c6ra15141h1.pdf]

## Supplementary Information

### Figures:

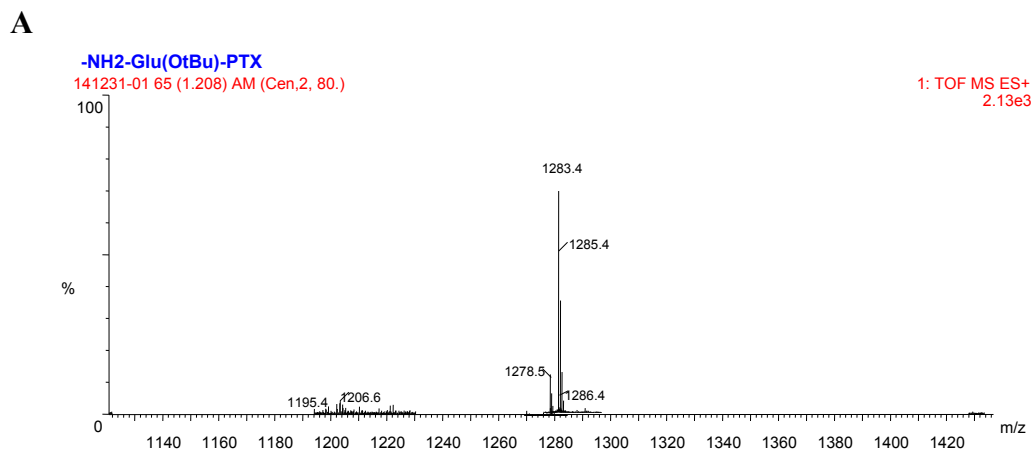

**B**

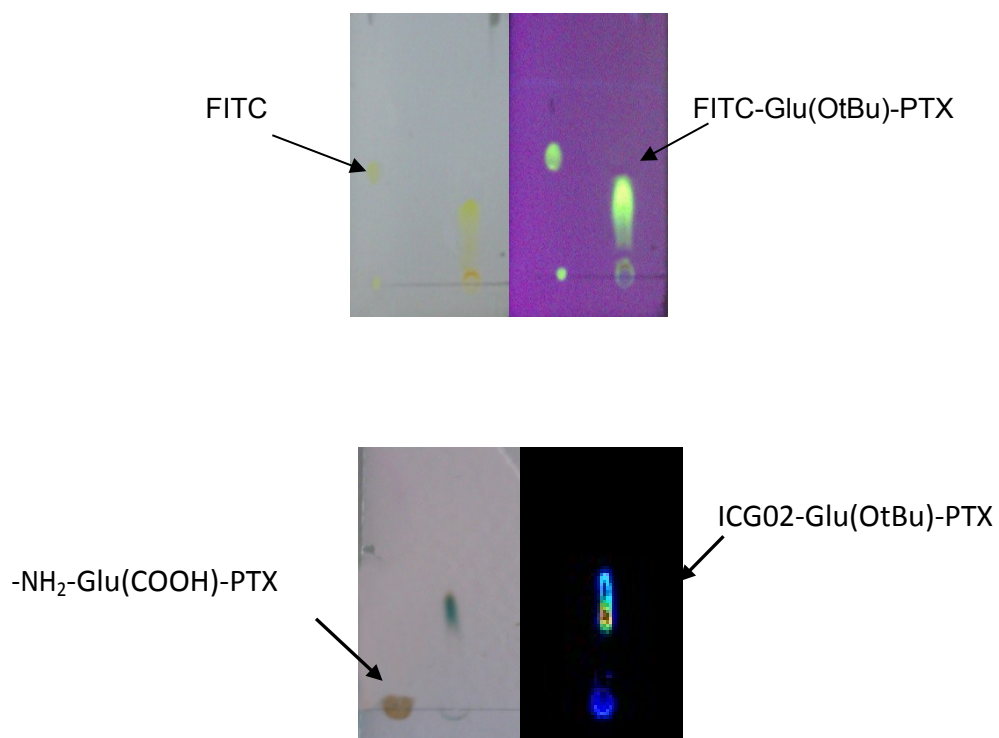

C

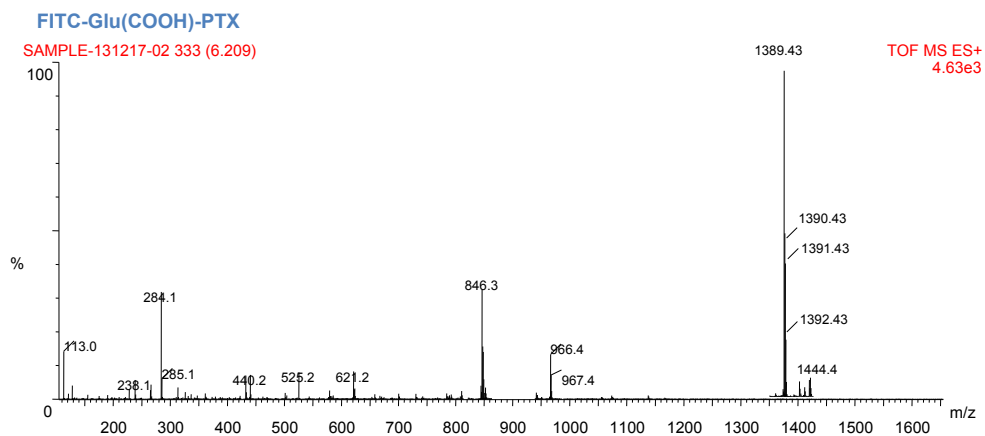

Fig. 1. Characterization of intermediate compounds. (A)  $\text{-NH}_2\text{-Glu(OtBu)-PTX}$ : MS (ESI, m/z): 1283.4( $[\text{M}+\text{Na}]^+$ ). (B) The fluorescence of FITC can be observed from the TLC of purified FITC-Glu(OtBu)-PTX using TLC imaging system, and the fluorescence of ICG02 can be observed from TLC of purified ICG02-Glu(OtBu)-PTX using NIR imaging system. (C) FITC-Glu(COOH)-PTX:MS(ESI,m/z): 1389.42( $[\text{M}+\text{H}]^+$ ).

**A**

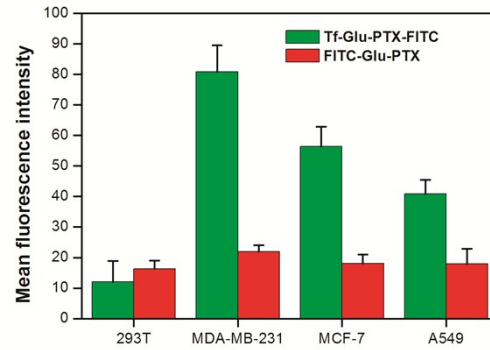

**B**

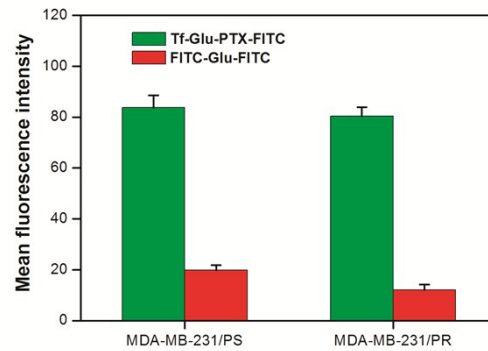

Fig. 2. (A) Mean fluorescence emission intensities of Tf-Glu-PTX-FITC or FITC-Glu-PTX from different cells: 293T, MDA-MB-231, MCF-7, and A549 cell. (B) Fluorescence intensity analysis of MDA-MB-231/PS and MDA-MB-231/PR cells after incubation with Tf-Glu-PTX-FITC or FITC-Glu-PTX.

Table 1: The IC<sub>50</sub> of PTX and Tf-Glu-PTX from different cell lines.

| Drug       | IC <sub>50</sub> ( $\mu$ g/ml) |       |       |       |
|------------|--------------------------------|-------|-------|-------|
|            | MDA-MB-231                     | MCF-7 | A549  | 293T  |
| PTX        | 62.67                          | 64.46 | 65.91 | 28.19 |
| Tf-Glu-PTX | 18.83                          | 21.49 | 24.12 | 42.18 |
